1 **Increasing role of pyrethroid-resistant *Anopheles funestus* in malaria transmission in**  
2 **the Lake Zone, Tanzania: implications for the evaluation of novel vector control**  
3 **products**

4  
5  
6 Nancy S. Matowo<sup>1\*</sup>, Jackline Martin<sup>2,4</sup>, Manisha A. Kulkarni<sup>3</sup>, Jacklin F. Mosh<sup>2</sup>, Eliud  
7 Lukole<sup>1,2</sup>, Gladness Isaya<sup>4</sup>, Boniface Shirima<sup>4</sup>, Robert Kaaya<sup>4</sup>, Catherine Moyes<sup>5</sup>, Penelope  
8 A. Hancock<sup>5</sup> Mark Rowland<sup>1</sup>, Alphaxard Manjurano<sup>2</sup>, Franklin W Mosh<sup>4</sup>, Natacha  
9 Protopopoff<sup>1+</sup>, Louisa A. Messenger<sup>1+</sup>

10 <sup>+</sup> these authors contributed equally to this work.

11 <sup>1</sup> Department of Disease Control, London School of Hygiene and Tropical Medicine, London,  
12 United Kingdom

13 <sup>2</sup> National Institute for Medical Research, Mwanza Medical Research Centre, Mwanza,  
14 Tanzania

15 <sup>3</sup> School of Epidemiology and Public Health, University of Ottawa, Ottawa, Canada

16 <sup>4</sup> Kilimanjaro Christian Medical University College, Moshi, Tanzania

17 <sup>5</sup> Big Data Institute, Li Ka Shing Centre for Health Information and Discovery, University of  
18 Oxford, United Kingdom

19

20 **Corresponding Author:** nancy.matowo@lshtm.ac.uk

21

22

23

24

25

26

27

28

29

30

31

32

33 **Abstract**

34 *Anopheles funestus* is playing an increasing role in malaria transmission in parts of sub-  
35 Saharan Africa, where *An. gambiae* s.s. has been effectively controlled by long-lasting  
36 insecticidal nets. We investigated vector population bionomics, insecticide resistance and  
37 malaria transmission dynamics in 86 study clusters in North-West Tanzania. *An. funestus* s.l.  
38 represented 94.5% (4740/5016) of all vectors and was responsible for the majority of malaria  
39 transmission (96.5%), with a sporozoite rate of 3.4% and average monthly entomological  
40 inoculation rate (EIR) of 4.57 per house. Micro-geographical heterogeneity in species  
41 composition, abundance and transmission was observed across the study district in relation to  
42 key ecological differences between northern and southern clusters, with significantly higher  
43 densities, proportions and EIR of *An. funestus* s.l. collected from the south. *An. gambiae* s.l.  
44 (5.5%) density, principally *An. arabiensis* (81.1%) and *An. gambiae* s.s. (18.9%), was much  
45 lower and closely correlated with seasonal rainfall. Both *An. funestus* s.l. and *An. gambiae* s.l.  
46 were similarly resistant to alpha-cypermethrin and permethrin. Overexpression of *CYP9K1*,  
47 *CYP6P3*, *CYP6P4* and *CYP6M2* and high L1014F-*kdr* mutation frequency were detected in  
48 *An. gambiae* s.s. populations. Study findings highlight the urgent need for novel vector  
49 control tools to tackle persistent malaria transmission in the Lake Region of Tanzania.

50

51

52

53

54

55

56

57

58

59

60

61

62

63

64

65

66

## 67 **Introduction**

68 The widespread deployment of primary vector control interventions, principally long-lasting  
69 insecticidal nets (LLINs) and indoor residual spraying (IRS), has substantially reduced  
70 malaria incidence across sub-Saharan Africa [1,2]. Between 2000 and 2015, 68% of the 1.5  
71 billion malaria cases averted can be attributed to LLINs alone [1]. However, current estimates  
72 indicate the rates of decline have begun to stagnate [2]. Tanzania is among the 10 sub-  
73 Saharan African countries where malaria burden is concentrated [3], contributing to 5% of  
74 global malaria deaths [2]. Malaria infection varies nationwide with an average prevalence of  
75 7.3% in children under 5 years of age in 2017 [4]. Vector control by the National Malaria  
76 Control Programme (NMCP) is based on sustaining high LLIN access and use [5], via  
77 universal coverage campaigns supplemented with continuous distribution from school net  
78 programmes, antenatal care campaigns and the expanded programme for immunization; and  
79 targeted IRS in high transmission areas in the North-West [6]. Effective and sustainable  
80 malaria vector control is plagued by a number of challenges, including the evolution of vector  
81 behavioural and physiological resistance to current control interventions [7]. In the majority  
82 of sentinel districts across Tanzania, *Anopheles* mosquitoes have demonstrated reduced  
83 susceptibility to at least one public health insecticide [8,9].

84

85 Continued use of insecticide-based malaria control tools has been linked with changes in  
86 *Anopheles* feeding and resting behaviors and relative species composition [10-13]. In some  
87 countries, *Anopheles funestus* sensu stricto (s.s.) has historically played a significant role in  
88 malaria transmission [14-17] largely due to its predominantly anthropophilic and endophilic  
89 tendencies [18], intense pyrethroid resistance [19-24] and greater daily survival probabilities  
90 (higher parity rates) [25,26]. In other areas, notably south-east Tanzania [25,27], far north-  
91 west Tanzania [28] and parts of Kenya [13], this species is rapidly replacing *An. gambiae* s.s.  
92 and *An. arabiensis*, following the scale-up of vector control interventions, and has been found  
93 with some of the highest *Plasmodium* sporozoite rates [25]. Increasing *An. funestus*  
94 population densities and vectorial capacity in these regions may be due to recent escalations  
95 in pyrethroid resistance intensities [13,25,27], but also changes in aquatic larval habitats  
96 which are more permissible for *An. funestus* breeding [29].

97

98 Malaria prevalence around Lake Victoria remains amongst the highest in Tanzania [30],  
99 despite high community-level coverage with LLINs, and periodic IRS campaigns [6,28].

100 Factors driving persistent malaria transmission in the region, including the relative  
101 importance of *An. funestus* sensu lato (s.l.) as a major vector species, are poorly characterised  
102 but warrant investigation for the design and strategic deployment of new vector control tools.  
103 We assessed vector population bionomics, malaria transmission dynamics, phenotypic  
104 insecticide resistance and underlying molecular and metabolic resistance mechanisms in 86  
105 study clusters in Misungwi district, north-west Tanzania, prior to a randomised controlled  
106 trial assessing the efficacy of next-generation LLINs to improve malaria control [31].

107

108

## 109 **Results**

110

### 111 **Household characteristics**

112 A total of 1,593 households were visited during two cross-sectional entomological field  
113 surveys, across 86 clusters in Misungwi district, North-West Tanzania on the southern shore  
114 of Lake Victoria, between August and December 2018 (Figure 1A).

115

116 <Insert Figure 1>

117

118 **Figure 1: Study area in Misungwi district, north western Tanzania, displaying A:**  
119 **location of Misungwi in the Lake Region; B: landcover features of study clusters; and**  
120 **C: annual precipitation (mm) in study clusters.**

121

122 <Insert Figure 2>

123

124 **Figure 2: Study area in Misungwi district, north western Tanzania, displaying A:**  
125 **distribution of *Anopheles funestus* s.l. and collection methods per cluster (hashed line**  
126 **indicates delineation between northern and southern clusters); B: distribution of**  
127 ***Anopheles gambiae* s.l.; and C: predicted pyrethroid resistance for *An. gambiae* s.l.**  
128 **(mean percentage mortality).**

129

130 <Insert Table 1>

131

132 **Table 1. Household characteristics in the study area in Northern and Southern clusters.**

133 The district spans two agro-ecological zones, based on vegetation land cover and rainfall  
134 (Figure 1), that are divided roughly into northern and southern clusters.

135 The study had an overall response rate of 86.2% (1372/1592), with consent to participate in  
136 the survey given from an adult/head of the household. Ten per cent (164) of dwellings were  
137 found vacant, 1.0% (16) were not located, 0.2% (3) not visited due to accessibility and 0.1%  
138 (2) were ineligible (no children under 15 years) during the survey period. A small proportion  
139 2.2% (35) refused to participate in the study. The average altitude of study households was  
140 1194.9 meters above sea level (Table 1). Similar proportions of houses were classified as  
141 improved or unimproved, based on construction with modern or traditional materials,  
142 respectively (Table 1; Figure 3A). Notably, few houses had mosquito proofing materials  
143 over the windows (29.9%) and almost no houses had ceilings (97.2%); 40.6% of houses had  
144 open eaves (Table 1; Figure 3A and B). The average household size was 6.6 persons and  
145 mean number of room/sleeping place was 2.7 per house. Forty-four per cent of households  
146 owned at least one livestock (mostly goats and cattle), which were usually kept outdoors  
147 about 20 metres away from the house.

148

149

<Insert Figure 3>

150 **Figure 3. A: examples of different traditional house constructions, using local materials.**  
151 **B: the inside of a typical house with open eaves. C: a CDC-LT hung at the base of a**  
152 **sleeping space for sampling mosquitoes indoors. D: a Furvela tent trap set up for**  
153 **catching host-seeking female *Anopheles* mosquitoes outdoors.**

154

155 LLIN ownership was very high in the study area with the majority of families owning at least  
156 one LLIN (94.9%); LLIN access was comparatively lower, however, the majority of  
157 households had enough LLINs to cover all of their sleeping places (62.3%). About 54.2% of  
158 households were sprayed during the 2015 IRS National Malaria Control Campaign (Table 1).  
159 There were no significant differences in household characteristics, including size, altitude,  
160 construction materials, however population access to insecticide-treated net (ITN) access was  
161 slightly higher in northern than southern clusters (Table 1).

162

### 163 **Vector distribution, species composition, relative abundance and seasonality**

164 A total of 23,081 mosquitoes, comprising 23.1% (5329) Anophelines and 76.9% (17,752)  
165 Culicines, were collected using Centers for Disease Control and Prevention light traps (CDC-  
166 LTs) during two cross-sectional survey rounds between August and December 2018, for a  
167 total of 1373 trap nights (Figure 3C). Most mosquito collections (82.1%) did not experience  
168 rainfall and 35.6% of collections had moderate winds.

169

170 Of the Anophelines collected, 94.1% (5016) were malaria vectors comprised of 94.5% (4740)  
171 *An. funestus* s.l. and 5.5% (276) *An. gambiae* s.l. Significantly greater numbers of *An.*  
172 *funestus* s.l. were collected across the study area compared to *An. gambiae* s.l.,  $p < 0.001$   
173 (average number of mosquitoes caught per trap per house per night were: *An. gambiae* s.l. =  
174 0.20 [95% CI: 0.15-0.27], *An. funestus* s.l. = 3.45 [95% CI: 2.58- 4.32]) (Table 2). Within the  
175 *An. funestus* complex, the predominant species found was *An. funestus* s.s. (92.9%; 710/764  
176 selected for species-specific PCR); other species identified were *An. parensis* (6.5%) and *An.*  
177 *rivulorum* (0.5%). Of the 194 *An. gambiae* s.l. selected for sibling species identification,  
178 81.1% were *An. arabiensis* and 18.9% were *An. gambiae* s.s (Table 2).

179

180

181

<Insert Table 2>

182 **Table 2. Malaria vector species composition, sporozoite rate and entomological**  
183 **inoculation rate (EIR) per study zone.**

184

185 Overall, significantly higher mosquito densities were observed in villages located in the  
186 southern clusters compared to the northern clusters (average number of *Anopheles* caught per  
187 trap per house per night in the northern zone=0.93, southern zone=8.04; Density Ratio  
188 (DR)=6.09 [95% CI: 3.00-12.38];  $p < 0.001$ ) (Table 2). There were significantly more *An.*  
189 *funestus* s.l. sampled from households in the southern part of the study area  
190 (average/house/night=7.85), compared to the north (0.72; DR=7.92 [95% CI: 3.76-16.67];  
191  $p < 0.001$ ). However, there was no statistical difference in *An. gambiae* s.l. collected between  
192 the two locations with an average of 0.21 per night in the northern zone and 0.19 in the  
193 southern zone (DR=1.28 [95% CI: 0.69-2.38];  $p = 0.431$ ) (Table 2).

194

195 Amongst sibling species of the *An. gambiae* complex, there were marked spatial and seasonal  
196 fluctuations. Most *An. gambiae* s.s (94.3%) were collected from the northern zone and more  
197 than 71.5% of *An. funestus* s.s from the southern part. Both *An. funestus* s.s and *An.*  
198 *arabiensis* predominated throughout the study period, but *An. gambiae* s.s. abundance peaked  
199 in December in the middle of the rainy season. An analysis of bioclimatic and landcover  
200 characteristics across the study area demonstrated several ecological differences between the  
201 northern and southern zones, with the former composed mostly of grassland and cropland  
202 (91%), with smaller proportions of shrubland and forest (7%) and areas prone to regularly

203 flooding (1%); and the latter with less grassland and cropland (80%) and greater proportions  
204 of shrubland and forest (14%) and areas prone to regular flooding (3%) (Supplementary table  
205 1). Furthermore, differences in rainfall were also observed between the northern and southern  
206 zones, with villages in the north receiving slightly higher average annual precipitation  
207 (959.5mm) than in the south (911.5mm).

208

209 While overall *An. gambiae* s.l density was low, it was closely correlated with seasonal  
210 rainfall patterns. Mean *An. gambiae* s.l caught per house during the dry season (August and  
211 September; average precipitation of 5-7 mm) was 0.14 but rose significantly by two-fold  
212 (DR=1.73 [95% CI: 1.08-2.78]; p=0.02) in the wet season (October, November and  
213 December; average precipitation of 147.3-158.5 mm). By comparison, the highest *An.*  
214 *funestus* s.l densities were observed during the dry months (mean=4.61) (Table 3).

215

216 The majority of sleeping spaces/beds where the CDC-LTs were installed had either Olyset®  
217 (60.5%; 830/1372) or PermaNet® 2.0 LLINs (36.0%; 494/1372); 0.5% (7) had both Olyset®  
218 and PermaNet® LLINs, previously distributed through mass universal replacement  
219 campaigns (URCs) that was conducted between 2014 and 2017 to achieve universal coverage  
220 [32]. The remaining 2.6% (48) of nets had no labels and 0.4% (6) were missing data on net  
221 type. There was no significant difference in malaria vector densities between rooms with the  
222 two main types of LLIN (average number of malaria vectors per house per night with  
223 Olyset® LLINs=3.59 [95% CI: 1.64 -5.54], versus PermaNet® 2.0 LLINs=3.89 [95% CI:  
224 1.78 -6.00]; p=0.111).

225

226

### 227 ***Plasmodium falciparum* infection and entomological inoculation rate**

228 A total of 1963 *Anopheles* mosquitoes (603 and 1360 from the northern and southern clusters,  
229 respectively) were tested for the presence of *Plasmodium falciparum* circumsporozoite  
230 protein (CSP), with 67 found infected, giving an overall sporozoite rate of 3.4% [95% CI:  
231 2.5-4.6] (Table 2). Of the *An. gambiae* s.l. and *An. funestus* s.l. individuals which tested CSP  
232 positive, 6.1% (4/66) were *An. gambiae* s.s., 1.5% (1/66) *An. arabiensis*, and 77.3% (51/66)  
233 *An. funestus* s.s., respectively; the remaining samples could not be amplified by PCR.  
234 Sporozoite rates were similar in *An. funestus* s.l. (3.44%) compared to *An. gambiae* s.l.  
235 (3.21%) (Table 3).

236



237

238

239

<Insert Table 3>

240 **Table 3. Seasonal variation between *An. funestus* s.l. and *An. gambiae* s.l. sporozoite rate**  
241 **and entomological inoculation rate (EIR).**

242

243 Overall sporozoite rate varied across the study area with the highest rates observed in the  
244 southern zone (Table 2; OR: 1.88, [95% CI: 1.02-3.46]; p=0.044). In southern clusters,  
245 sporozoite rates for *An. funestus* s.l. was significantly higher than in northern clusters (OR:  
246 2.33, [95% CI: 1.11-4.95]; p=0.028). The monthly sporozoite rate for *An. funestus* s.l. and  
247 *An. gambiae* s.l. fluctuated across the dry and wet seasons with slightly higher, but not  
248 significant, rates in the wet season (Table 3). *An. funestus* s.s. maintained malaria  
249 transmission across both seasons (sporozoite rates of 2.85% [95% CI: 1.71-4.72] and 3.82%  
250 [95% CI: 2.56-5.66], during the dry and wet seasons, respectively) while *An. gambiae* s.s.  
251 appeared to contribute to transmission mainly in the rainy season (sporozoite rates of 1.85%  
252 [95% CI: 0.23-13.24] and 3.59% [95% CI:1.34-9.23] during the dry and wet seasons,  
253 respectively) (Table 3).

254

255 In Misungwi district, malaria transmission occurs throughout the year. The average  
256 Entomological Inoculation Rate (EIR), weighted to account for the proportion of sampled  
257 *Anopheles* vectors processed for *Plasmodium* sporozoite infection, was 4.4 infective bites per  
258 house per month, approximately 53.3 per house per year, with variation in transmission  
259 intensities across the study area and seasons (Table 2 and 3). Overall, *An. funestus* s.s. was  
260 the major malaria vector responsible for 96.5% of total transmission (Table 3). Communities  
261 living in the southern part of the study area experienced significantly higher malaria  
262 transmission (EIR=9.6) compared to the northern zone (EIR=0.6) (Table 2). Monthly EIR  
263 was higher in the wet compared to the dry season, for both *An. funestus* s.l. (3.82 vs. 2.85)  
264 and *An. gambiae* s.l. (3.59 vs. 1.85; Table 3)

265

266

### 267 ***Anopheles* feeding and resting behaviours**

268 A total of 1108 *Anopheles* vectors were sampled using four collection methods (CDC-LTs  
269 indoors, Furvela tent traps outdoors (Figure 3D), Prokopack aspirators indoors and outdoors),  
270 in 96 houses across 48 clusters between December 2018 and January 2019.



271

272

273

274

<Insert Table 4>

275 **Table 4. Indoor and outdoor *Anopheles* feeding and resting behaviours and species**  
276 **composition.**

277

278 As summarized in Table 4, the greatest proportions of *Anopheles* were sampled by indoor  
279 CDC-LTs (48.4%) and outdoor tent traps (41.9%). *An. arabiensis* and *An. gambiae* s.s.  
280 showed similar tendencies of feeding both indoors (54.7% and 45.3% collected in CDC-LTs,  
281 respectively) and outdoors (51.8% and 48.2% collected in tent traps, respectively) but *An.*  
282 *arabiensis* had a much stronger exophilic habit than *An. gambiae* s.s. (89.5% [95% CI: 54.3-  
283 98.4] vs. 10.5% [95% CI: 1.6-45.7] in Prokopack collections outdoors, respectively) (Table  
284 4). *An. funestus* s.s. demonstrated similar behaviour to *An. gambiae* s.s., predominantly  
285 feeding indoors (CDC-LT collections) and outdoors (tent trap collections) (66.4% and 50.2%,  
286 respectively) and resting indoors (Prokopack collections) (48.2% [95% CI: 23.3-73.2]).  
287 Sporozoite rates were higher in samples collected indoors (range between 1.7% [95% CI: 0.8-  
288 3.5] and 3.9% [95% CI: 1.0-14.4]), compared to outdoors (range between 0% and 1.7% [95%  
289 CI: 0.8-3.6]) (Table 4). Malaria transmission both indoors and outdoors was solely due to *An.*  
290 *gambiae* s.s and *An. funestus* s.s.; none of the vectors collected resting outdoors were  
291 sporozoite positive.

292

293

294 **Phenotypic resistance and underlying molecular and metabolic resistance mechanisms**

295 Wild populations of *An. funestus* s.l. and *An. gambiae* s.l. from across the study area were  
296 confirmed resistant to the diagnostic concentration of alpha-cypermethrin, with mean 30-  
297 minute knock-down ranging from 43.7% to 59.4% (Table 5). Similarly, both species were  
298 resistant to permethrin, with average 24-hour mortality ranging between 38.3% to 56.5%  
299 (Table 6). In general, levels of resistance to both pyrethroids were comparable between *An.*  
300 *gambiae* s.l. and *An. funestus* s.l., as well as between northern and southern study zones  
301 (Figure 2C and Tables 5 and 6).

302

303 Overall, the majority 92.2% (565/615) of *An. funestus* s.l. mosquitoes tested in bioassays were  
304 confirmed by PCR as *An. funestus* s.s, with a small proportion of *An. parensis* (7.8%;

305 48/615). *An. gambiae* s.l. from bioassays that were tested for sibling species identification,  
306 were classified as similar proportions of *An. gambiae* s.s. (45.3%; 48/106) and *An. arabiensis*  
307 (54.7%; 58/106).

308

309

<Insert Table 5>

310 **Table 5. Average 30-minute knock-down and 24-hour mortality to the diagnostic dose of**  
311 **alpha-cypermethrin (CDC bottle bioassays: 12.5 µg/ml), among wild *Anopheles* species,**  
312 **collected from three study clusters in Misungwi, 2018.**

313

314

315

<Insert Table 6>

316 **Table 6. Average 60-minute knock-down and 24-hour mortality to the diagnostic dose of**  
317 **permethrin (WHO tube bioassays: 0.75%), among wild *Anopheles* species, collected**  
318 **from five study wards in Misungwi, 2018.**

319

320

321 Three hundred and twenty-two field collected *An. gambiae* s.l. were screened for the presence  
322 of L1014F-*kdr* and L1014S-*kdr* mutations. At the population level, homozygous L1014S-*kdr*  
323 was present in almost all *An. gambiae* s.s. individuals (98%; 90/92), with evidence for  
324 significant deviations from Hardy-Weinberg equilibrium ( $\chi^2=40.21$ ;  $p<0.0001$ ). No L1014S-  
325 *kdr* or L1014F-*kdr* were detected in any *An. arabiensis* tested (n=230); L1014F-*kdr* was not  
326 detected in any *An. gambiae* s.s. individuals.

327

328 Comparison of metabolic gene expression in *An. gambiae* s.s. collected from Mamaye ward  
329 (northern zone) demonstrated up-regulation of *CYP6M2* (fold change; FC=0.37 [95% CI:  
330 0.20-0.43]), *CYP6P3* (FC=1.58 [95% CI: 0.89-2.07]), *CYP6P4* (FC=0.78 [95% CI: 0.46-  
331 1.11]) and *CYP9K1* (FC=1.58 [95% CI:1.19-4.80]).

332

333 Mean mortality 24 hours after exposure to the standard diagnostic dose of alpha-cypermethrin  
334 was predicted for *An. gambiae* s.l. in 2017 using a geospatial model. The model used data  
335 from WHO susceptibility tests conducted from 2005 to 2017 and incorporated associations  
336 between resistance and potential explanatory variables such as ITN coverage using three  
337 different machine learning approaches. Predicted mean mortality in *An. gambiae* s.l. for each

338 5 x 5 km square (Figure 2C) was high across Tanzania in 2017. Within Misungwi, the lowest  
339 mortalities / highest resistance occurred in the west and northwest.

340

### 341 **Discussion**

342 Despite substantial gains achieved in malaria control across Tanzania over the past 20 years,  
343 attributable to improved quality and access to diagnostics and treatment and the widespread  
344 scale-up of LLINs and targeted IRS, localised transmission persists, especially in the Lake  
345 Region. Study findings demonstrate that *An. funestus* s.l. is becoming a dominant, efficient  
346 malaria vector species in Misungwi district, north-west Tanzania in an area with high  
347 coverage of standard pyrethroid LLINs and historical IRS activities. A similar phenomenon  
348 has recently been reported from south-eastern Tanzania [25]; however, our study indicates  
349 this shift in species composition may not be restricted to the south of the country.

350

351 Around Lake Victoria, species abundance and transmission intensity vary quite considerably  
352 spatially and temporally [28], with implications for the deployment of effective malaria  
353 vector control interventions. These heterogeneities likely reflect differences in climatic  
354 conditions such as rainfall and ecological settings, which support the breeding of particular  
355 vector species [29]. In our study, overall vector densities were significantly higher in villages  
356 located in the southern part of the study district compared to the northern clusters. *An.*  
357 *gambiae* s.s. and *An. arabiensis* occurred across Misungwi district, however, *An. gambiae* s.s.  
358 abundance was lower in the south and concentrated mostly in the north. By comparison, *An.*  
359 *funestus* s.s. was equally distributed throughout the district in sympatry with *An. arabiensis*  
360 and *An. gambiae* s.s., but found at the highest densities along shorelines and waterways  
361 feeding into Lake Victoria. The spatial variation of *Anopheles* sibling species may be  
362 explained by several factors linked to ecological features, including turbidity, water quality,  
363 relative humidity, temperature, vegetation type and/or socioeconomic parameters, such as  
364 ownership and usage of insecticide-based vector control measures and livestock density, as  
365 observed in previous studies conducted on the Kenyan side of Lake Victoria [33]. *An.*  
366 *gambiae* s.s. are known to breed in rain-dependent temporary habitats [34], while *An.*  
367 *funestus* s.s. and *An. arabiensis* can colonize large permanent aquatic habitats, some with  
368 large vegetation, in arid and highland areas [35,36]. Most residents in Misungwi district,  
369 especially in the southern clusters, traditionally stored rainwater for domestic purposes and  
370 animal husbandry in large, permanent man-made pools, locally called “Rambo”, which were  
371 filled throughout the year and could serve as potential breeding sites for *An. funestus* s.s. and

372 *An. arabiensis*, even in the dry season; the higher density of *An. gambiae* s.s. during the rainy  
373 season is likely due to increased availability of temporary breeding sites [37,38]. In addition,  
374 agricultural practices such as irrigated rice paddies create diverse aquatic mosquito breeding  
375 habitats that could influence the co-existence and abundance of different vector species in the  
376 study area [39,40]. *An. funestus* s.l was collected in both seasons but peaked during the dry  
377 season, consistent with its ability to develop in habitats that can sustain desiccation [41]. Of  
378 concern, both *An. gambiae* s.l. and *An. funestus* s.l. malaria vector species were present  
379 during different seasons, favoured by distinct climatic and ecological conditions, sustaining  
380 malaria transmission throughout the region and the year. Of all mosquitoes sampled in this  
381 study, *Culex* species were the most abundant, contributing to 67.6% of the indoor host-  
382 seeking population. Previous studies in Tanzania have highlighted that *Culex* species,  
383 commonly referred to as “the house mosquito”, predominant in malaria-endemic  
384 communities [42], and when resistant to public health insecticides, can jeopardise community  
385 adherence to vector control interventions, due to perceived failure of these strategies [43,44].

386

387 This study estimated that each household could receive an average of more than 53 infective  
388 bites per year from both major vector species (*An. funestus* s.s. and *An. gambiae* s.s.) despite  
389 high coverage of LLINs. Comparably high EIRs have also been reported from other rural and  
390 peri-urban regions of East Africa, including south-central Tanzania [45], coastal Kenya [46]  
391 and southwest Ethiopia [47]. Furthermore, the annual EIR was ten times higher in villages  
392 located in the southern part of the study district compared to the north. In northern clusters,  
393 where *An. gambiae* s.s. and *An. funestus* s.s co-existed, even though *An. gambiae* s.s. was  
394 present in very low numbers, these two species generally had equivalent *Plasmodium*  
395 infection rates. Both *An. gambiae* s.s. and *An. funestus* s.s. can be highly anthropophilic and  
396 endophilic, but the former species may be more aggressive and efficient vector in terms of  
397 malaria transmission, possibly due to host competition. In the southern study clusters, malaria  
398 transmission was almost exclusively mediated by *An. funestus* s.s. Only a single *P.*  
399 *falciparum*-infected *An. arabiensis* was collected during the study which might be explained  
400 by its highly opportunistic behaviour, feeding on both animals and humans; in the absence of  
401 the latter host it can display strongly zoophilic feeding preferences for livestock, of which  
402 close to half of the households owned [48,49]. This species is also known for its more  
403 exophilic tendencies compared to *An. gambiae* s.s. [49,50] and can easily adapt and feed  
404 outdoors in response to insecticidal interventions [51], especially when human or animal  
405 populations are available outside [12]. Our indoor and outdoor collections generally support

406 these behavioural assumptions, with both *An. gambiae* s.s. and *An. funestus* s.s. sampled in  
407 similar proportions across different traps, with the exception of *An. gambiae* s.s., which was  
408 found at very low densities resting outdoors. The occurrence of highly endophilic and  
409 anthropophilic vectors such as *An. funestus* s.s. host-seeking or resting outdoors could be  
410 linked to behavioural divergence among vector populations and/or chromosomal inversion  
411 polymorphisms [52,53], as well as human behavioural changes [54]. However, in our study,  
412 more sporozoite-harboured mosquitoes were collected in houses, suggesting ongoing malaria  
413 transmission is still occurring inside, despite high intervention coverage. The strongly  
414 exophilic behaviour of *An. arabiensis* indicated that LLINs and IRS in Misungwi district may  
415 have minimal effect against this species; although its relative importance in local malaria  
416 transmission appears diminished. Moreover, the presence of infected *An. gambiae* s.s. and  
417 *An. funestus* s.s. outdoors, coupled with a degree of exophilic behaviour, suggests that  
418 additional control tools targeting outdoor vector populations may warrant consideration in the  
419 study area [55].

420

421 All three major vector species (*An. gambiae* s.s., *An. arabiensis* and *An. funestus* s.s.),  
422 displayed low levels of susceptibility to alpha-cypermethrin and permethrin, primarily due to  
423 selection pressure from prolonged use of pyrethroid-based LLINs and likely enhanced by  
424 concurrent agricultural pesticide application [56-58]. Study findings align with others in the  
425 Lake Zone and across Tanzania, demonstrating low mortality among vector populations to  
426 the diagnostic doses of pyrethroids [9,57,59]. Data collected across Africa indicated that  
427 previously pyrethroid resistance was higher in east African populations of *An. funestus* s.l.  
428 compared to east African populations of *An. gambiae* s.l. up to 2017, but this difference was  
429 not detected in Misungwi in 2018-19 [60,61]. It is noteworthy that our bioassays presented  
430 higher levels of resistance in *An. gambiae* s.l. in comparison to those shown in our map  
431 produced by geospatial models of phenotypic resistance to alpha-cypermethrin for the year  
432 2017, suggesting pyrethroid resistance may be increasing in *An. gambiae* s.l. populations in  
433 the region. In Misungwi district, population-level frequency of the L1014S-*kdr* mutation  
434 was practically fixed in *An. gambiae* s.s., while *CYP6M2*, *CYP6P3*, *CYP6P4* and *CYP9K1*  
435 were modestly upregulated by comparison to reports from West Africa [62-64]. These results  
436 indicate that both target site and metabolic mechanisms may be driving pyrethroid resistance  
437 in *An. gambiae* s.s. in this study area. However, further investigation is necessary to identify  
438 resistance mechanisms specific to these field populations for prospective monitoring and to  
439 improve our understanding of the specificity of resistance mechanisms to individual

440 interventions and the likelihood of selecting for cross-resistance between active ingredients  
441 [62-64]. Importantly, intense insecticide resistance may partially explain the persistent  
442 malaria transmission in Misungwi district, highlighting the urgent need for novel vector  
443 control tools, containing different insecticide classes and combinations. This study was  
444 undertaken prior to the phase III evaluation of novel bi-treated LLINs containing a pyrethroid  
445 and either a pyrrole (chlorfenapyr), a synergist (piperonyl butoxide; PBO) or a juvenile  
446 growth hormone inhibitor (pyriproxyfen; PPF) [31], which may have the potential to control  
447 malaria transmitted by pyrethroid-resistant vector species.

448

449 This study was conducted to characterize baseline vector population bionomics and malaria  
450 transmission dynamics in Misungwi district, with some limitations. Because mosquito  
451 collections spanned five months of the year, encompassing the short rainy season (October to  
452 December 2018) and part of the dry season (August and September 2018), vector densities,  
453 sibling species composition and sporozoite rates reported in this study may not be  
454 representative of the annual variation in this area. Additional studies are ongoing  
455 investigating in-depth the association between vector spatial distributions and key ecological  
456 indices, and to identify insecticide resistance mechanisms in *An. funestus* s.l., which at the  
457 time of study design, was not anticipated to emerge as the major vector species in Misungwi  
458 district.

459

## 460 **Conclusion**

461 In Misungwi district, North-West Tanzania, *An. funestus* s.s. is the leading malaria vector  
462 species, predominating in southern villages of the study site, across dry and wet seasons. *An.*  
463 *gambiae* s.s was present in much lower densities, concentrated mostly in the north during the  
464 wet season, potential driving malaria epidemics. Annual EIR was high, despite high LLIN  
465 usage, but variable within a small geographical area, influenced by vector species diversity  
466 and bionomics, with serious epidemiological implications for malaria control. *An. gambiae*  
467 s.s., *An. arabiensis* and *An. funestus* s.s. were found similarly resistant to pyrethroids, with  
468 high frequencies of target site alleles and overexpression of detoxification genes identified in  
469 *An. gambiae* s.s. Study findings highlight the urgent need for novel vector controls strategies,  
470 which incorporate new chemical classes, to control malaria transmitted by pyrethroid-  
471 resistant vector populations and sustain gains in malaria control across the Lake Region.

472

473



474

475

476

477

478

479

480 **Methods**

481

482 *Study area characteristics*

483 The study was carried in Misungwi district (latitude 2.85000 S, longitude 33.08333 E) in  
484 North-West Tanzania on the southern shore of Lake Victoria (Figure 1A). Misungwi lies at  
485 an altitude of 1,150 meters above sea level, with a population of approximately 351,607  
486 according to the National population and housing census of 2012 [65]. The district  
487 experiences a dry season typically between June and September and two annual rainy  
488 seasons; the long-rainy season between February and May and a short-rainy season between  
489 November and December with average annual rainfall ranging between 0.5 and 58.8 mm.  
490 The district is geographically divided into two main agro-ecological zones (northern and  
491 southern zones), based on the vegetation land cover and amount of rainfall. The local  
492 communities practice rice, millet and cotton farming, domestic animal rearing, fishing and  
493 have small-scale businesses as sources of income and food. In preparation for the CRT, the  
494 study area was sub-divided into 86 clusters, containing 72 villages made up of 453 hamlets  
495 from 17 wards (Figure 2). Detailed criteria and methodology used for cluster formation is  
496 described elsewhere [31].

497

498 Across Misungwi district, a typical compound was comprised of a main house and cattle  
499 shed. Houses were generally constructed from both modern and traditional materials and  
500 most houses had eave spaces (an opening between the wall and the roof for ventilation)  
501 (Figure 3A and B). The area experiences moderate to high malaria transmission and malaria  
502 incidence peaks shortly after the rainy seasons [66]. Recent studies conducted in 2010 and  
503 2017 reported a malaria prevalence of 51.3% across all age groups and 46.3% in school  
504 children (7-14 years). LLINs mainly Olyset® and PermaNet® 2.0 obtained through national  
505 bed net distribution campaigns have been the primary malaria control method in the study  
506 area [4,67] and IRS was last conducted in this region in 2015. A preliminary survey carried  
507 out by our study team in 2018 found *An. gambiae* s.s. *An. arabiensis* and *An. funestus* s.s. as  
508 the predominant malaria vector species in the study area.

509



### 510 ***Environmental characteristics of northern and southern clusters***

511 To characterize the study area with regards to climatic and environmental conditions, high  
512 spatial resolution satellite remote sensing and other geospatial data were downloaded in raster  
513 (i.e. gridded) format from publicly available data sources and processed using ArcGIS 10.5.1  
514 (ESRI, Redlands, USA). Data on eight bioclimatic variables at 1 km<sup>2</sup> spatial resolution,  
515 representing averages for the years 1970-2000, were obtained from the WorldClim 2 database  
516 [68]: annual mean temperature (Bio1), temperature seasonality (Bio4), maximum and  
517 minimum temperature of the warmest month (Bio 5 and 6), annual precipitation (Bio12),  
518 precipitation of the wettest and driest months (Bio13 and 14), and precipitation seasonality  
519 (Bio15). Global elevation data were obtained for the study area from NASA's Shuttle Radar  
520 Topography Mission (SRTM) 4.1 at 90-meter spatial resolution [69]. Global landcover data  
521 were obtained from the European Space Agency GlobCover 2009 project, available at 300-  
522 meter spatial resolution (© ESA 2010 and UCLouvain;  
523 [http://due.esrin.esa.int/page\\_globcover.php](http://due.esrin.esa.int/page_globcover.php)). These data identify 22 landcover types, of which  
524 12 were identified in the study area. Zonal mean statistics for the northern and southern  
525 clusters were calculated for each bioclimatic variable and elevation using the spatial analyst  
526 toolbox in ArcGIS; cluster means were then averaged for each zone (Supplementary Table 1).  
527 The proportion of cells within each of the northern and southern zones that were classified as  
528 different landcover types were similarly calculated; Supplementary Table 1 shows the results  
529 for the five dominant landcover types that were present in the study area [mosaic vegetation  
530 (i.e. grassland/shrubland/forest: 50-70% / cropland: 20-50%), herbaceous vegetation (i.e.  
531 grassland/savannas), shrubland, broadleaf deciduous forest/woodland, and grassland or  
532 woody vegetation on regularly flooded or waterlogged soil], which represent 98.9% and  
533 97.5% of the total area of the northern and southern clusters, respectively. While the available  
534 data sources, and hence these estimates, are derived from time periods prior to the study  
535 period, we assume that the estimates accurately reflect relative differences in climatic and  
536 environmental conditions across the study area.

537

### 538 ***Indoor and outdoor entomological surveillance***

539 Two cross-sectional entomological field surveys were conducted between August and  
540 December 2018 in all 86 clusters, using CDC-LTs (John W Hock Company, USA). Eight  
541 households were randomly selected from a census list of households generated during  
542 baseline enumeration. CDC-LTs were hung next to the feet of an occupant sleeping under an  
543 ITN/untreated net (about 1m from the ground), between 19:00 and 7:00. A questionnaire was

544 administered to the head of the household to gather information related to the house structure  
545 (type of wall and roofing materials, windows screening, number of rooms, number of  
546 sleeping places, presence of eaves), and coverage and usage of LLINs/untreated nets. Direct  
547 observation was also used during data collection to validate participant answers.

548

549 Assessment of *Anopheles* vector feeding and resting behaviours indoors and outdoors was  
550 undertaken in 48 clusters between December 2018 and January 2019. Two households per  
551 cluster were randomly selected, and each house was installed with a CDC-LT indoors and an  
552 occupied Furvela tent trap outdoors [70]. Both Furvela and CDC-LTs were switched on at  
553 19:00 and off at 7:00. Indoor and outdoor resting adult *Anopheles* were collected from the  
554 same houses using a 12 voltage battery-powered Prokopack aspirator [71], and manual mouth  
555 aspirators [72,73]. Systematic sampling of adult resting mosquitoes on the walls, roofs and  
556 floors were conducted for up to three minutes depending on the size of the room. Outdoor  
557 collections were performed from potential resting sites around the house, such as open resting  
558 structures, cow sheds and pit latrines.

559

#### 560 ***Insecticide resistance testing***

561 Insecticide resistance profiles of wild populations of *An. gambiae* s.l and *An. funestus* s.l were  
562 assessed in six clusters selected on the basis of high *Anopheles* population densities. Adult  
563 female *Anopheles* were collected resting indoors using both Prokopack and mouth aspirators  
564 [71]. Mosquitoes were separated by species complex and supplied with 10% glucose solution  
565 for 72 hours to allow digestion of blood meal, prior to bioassay testing with permethrin and  
566 alpha-cypermethrin. In WHO tube assays, 20-25 gravid female *An. gambiae* s.l. or *An.*  
567 *funestus* s.l. of unknown age were exposed to 0.75% permethrin for 60 minutes [74]. In CDC  
568 bottle bioassays, 20-25 gravid female *An. gambiae* s.l. or *An. funestus* s.l. of unknown age  
569 were exposed to 12.5 µg/ml alpha-cypermethrin for 30 minutes [75]. For both assays, knock-  
570 down was recorded at the end of the diagnostic exposure time (30 or 60 minutes after  
571 exposure, for CDC or WHO bioassays, respectively), and final mortality was scored after 24  
572 hours. All mosquitoes tested in bioassays were stored individually for sibling species  
573 identification.

574

#### 575 ***Mosquito processing, species identification and sporozoite detection***

576 Adult female mosquitoes collected from the cross-sectional surveys, resistance bioassays and  
577 behaviour study were sorted and identified based on their morphology, separating *An.*  
578 *gambiae* s.l. from *An. funestus* s.l. and from other genera according to Gillies and Coetzee  
579 [76]. At least three female *An. gambiae* s.l. and three *An. funestus* s.l. per household/ per  
580 collection method was analysed for presence of *Plasmodium falciparum* CSP using enzyme-  
581 linked immunosorbent assay (CSP-ELISA) [77]. All CSP positive samples and a sub-sample  
582 of CSP negative *An. gambiae* s.l. and *An. funestus* s.l. from the cross-sectional surveys,  
583 resistance bioassays and behaviour study, were randomly picked per house and tested for  
584 species identification. DNA was extracted from legs/wings and TaqMan assays were  
585 performed to distinguish sibling species in *An. gambiae* [78] or *An. funestus* complexes [79].

586

### 587 ***Identification of insecticide resistance mechanisms***

588 A subsample of *An. gambiae* s.s. and *An. arabiensis* were genotyped for L1014F-*kdr* and  
589 L1014S-*kdr* mutations associated with pyrethroid and DDT resistance, using TaqMan PCR  
590 assays. [80]. Blood-fed indoor resting female adult mosquitoes (F0s) were collected using  
591 mouth aspirators from three wards, sampled for phenotypic resistance testing. Mosquitoes  
592 were held for 3-4 days to allow for blood meal digestion. Individual *An. gambiae* s.l. were  
593 placed into Eppendorf tubes containing moist filter papers and forced to lay eggs, as  
594 previously described [23]. The first 3-5 emerged F1 adults from each parent were stored  
595 individually in RNAlater® and preserved at -20°C for gene expression analysis. Expression  
596 profiles for metabolic detoxification genes in a sub-sample of 250-300 F1 wild-caught female  
597 *An. gambiae* s.s. mosquitoes were determined using quantitative reverse transcriptase PCR  
598 (qRT-PCR) [81,82]. Individual mosquitoes were first tested for species identification, and  
599 only mosquitoes identified as *An. gambiae* s.s. were analyzed. A minimum of 5 pools of 10  
600 *An. gambiae* s.s. were analysed for *CYP6M2*, *CYP6P3*, *CYP6P4* and *CYP9K1* gene expression  
601 [81].

602

### 603 ***Data analysis***

604 Field data were entered into an Open Data Kit (ODK) form. Data analysis was performed  
605 using Stata/IC 15.1 (Stata Corp., College Station, USA) [83]. Mean *Anopheles* caught per  
606 night per household, sporozoite rate and their 95% confidence intervals (CIs) were estimated  
607 according to study zones (North or South), season (wet or dry) and *Anopheles* species.  
608 *Anopheles* vector population density and entomological inoculation rate (EIR) were analysed  
609 and compared between study zones and seasons using multilevel negative binomial

610 regression taking into account clustering effect. The EIR was calculated at household level as  
611 the average number of CSP-ELISA positive mosquitoes per night and was weighted to  
612 account for the proportion of collected *Anopheles* processed for CSP-ELISA. Logistic  
613 regression was used to compare sporozoite rates between the two study zones and seasons.  
614 The proportion of households with at least one LLIN was computed by dividing total nets  
615 observed and recorded by total households surveyed. Net access was estimated from the  
616 proportion of households with enough LLINs over total sleeping places. Unimproved houses  
617 were classified as houses with open eaves, unscreened windows, and were constructed from  
618 traditional low-quality materials such as a thatched roof, mud and non-plastered walls.  
619 Improved houses had closed eaves, with mosquito proof mesh on the windows, and were  
620 built with improved modern materials such as an iron sheet as a roof, brick/blocks, with  
621 plastered walls.

622

623 For resistance phenotyping, mean percentage knock-down/mortality post-exposure was  
624 calculated and interpreted following the WHO and CDC criteria [74,75]. Susceptibility  
625 thresholds were considered at the diagnostic time (24 hours and 30 minutes post-exposure for  
626 WHO and CDC bioassays, respectively). Mean mosquito mortality between 98 and 100%  
627 indicated full insecticide susceptibility, 90-97% showed suspected resistance that needed  
628 confirmation and less than 90% indicated confirmed resistance [74,75]. When control  
629 mortality was between 5-20%, results were corrected using Abbott's formula [74]. If the  
630 control mortality was  $\geq 20\%$ , the test was discarded [74].

631

632 Gene expression and fold-change, relative to the susceptible laboratory strain *An. gambiae*  
633 s.s. Kisumu were calculated according to the  $2^{-\Delta\Delta Cq}$  method [84] after standardisation with  
634 housekeeping genes (elongation factor; *EF* and 40S ribosomal protein *S7*; *RPS7*).

635

636 To estimate spatial and temporal trends in pyrethroid resistance using the available field data,  
637 which is sparse and has a heterogeneous distribution, a total of 6,423 observations of  
638 mortality from WHO susceptibility tests from 2005-2017 were used to inform a Bayesian  
639 geostatistical ensemble model. The model was also informed by a suite of 111 potential  
640 explanatory variables describing potential drivers of selection for resistance such as ITN  
641 coverage and produced estimates of mean mortality in *An. gambiae* s.l. for two regions of  
642 Africa [61]. Here we present the results for alpha-cypermethrin resistance in Misungwi in  
643 2017.

644

645

646 ***Ethical approval and consent to participate***

647 This study is part of an ongoing RCT in Misungwi (clinical trial registration: [NCT03554616](#))  
648 which obtained ethical clearance from the National Institute for Medical Research (NIMR),  
649 Tanzania (NIMR/HQ/R.8a/Vol. IX/2743) and the London School of Tropical Medicine and  
650 Hygiene, United Kingdom (LSHTM ethics ref: 14952) [31]. All study procedures were  
651 performed in accordance with relevant guidelines and regulations. Prior to study initiation,  
652 community consent was sought from village leaders and written, informed consent was  
653 obtained from the heads of all households selected for participation. Study information,  
654 including the study purpose, risks and benefits, was provided to participants in Swahili.

655

656 ***Data availability***

657 The data sets generated and/or analysed during the current study are not public but are  
658 available from the corresponding author on reasonable request

659

660 **References**

661

- 662 1. Bhatt S, Weiss D, Cameron E, Bisanzio D, Mappin B, et al. (2015) The effect of malaria  
663 control on Plasmodium falciparum in Africa between 2000 and 2015. *Nature* 526:  
664 207-211.
- 665 2. WHO (2020) World Malaria Report.
- 666 3. Organization WH (2018) High burden to high impact: a targeted malaria response. World  
667 Health Organization.
- 668 4. Ministry of Health CD, Gender, Elderly, Children MoH, National Bureau of Statistics ,  
669 Office of the Chief Government Statistician , ICF (2018) Tanzania Malaria Indicator  
670 Survey 2018. MoHCDEGEC, MoH, NBS, OCGS, and ICF Dar es Salaam, Tanzania,  
671 and Rockville ....
- 672 5. Yukich J, Stuck L, Scates S, Wisniewski J, Chacky F, et al. (2020) Sustaining LLIN  
673 coverage with continuous distribution: the school net programme in Tanzania.  
674 *Malaria journal* 19: 1-12.
- 675 6. PMI (2019) Presidents Malaria Initiative, Malaria Operational Plan: Tanzania FY 2019.  
676 USAID.
- 677 7. Ranson H, Lissenden N (2016) Insecticide resistance in African Anopheles mosquitoes: a  
678 worsening situation that needs urgent action to maintain malaria control. *Trends in*  
679 *parasitology* 32: 187-196.
- 680 8. Kisinza WN, Nkya TE, Kabula B, Overgaard HJ, Massue DJ, et al. (2017) Multiple  
681 insecticide resistance in Anopheles gambiae from Tanzania: a major concern for  
682 malaria vector control. *Malar J* 16: 439.

- 683 9. Matiya DJ, Philbert AB, Kidima W, Matowo JJ (2019) Dynamics and monitoring of  
684 insecticide resistance in malaria vectors across mainland Tanzania from 1997 to 2017:  
685 a systematic review. *Malaria Journal* 18: 102.
- 686 10. Moiroux N, Gomez MB, Penner C, Elanga E, Djènontin A, et al. (2012) Changes in  
687 *Anopheles funestus* biting behavior following universal coverage of long-lasting  
688 insecticidal nets in Benin. *The Journal of infectious diseases* 206: 1622-1629.
- 689 11. Reddy MR, Overgaard HJ, Abaga S, Reddy VP, Caccone A, et al. (2011) Outdoor host  
690 seeking behaviour of *Anopheles gambiae* mosquitoes following initiation of malaria  
691 vector control on Bioko Island, Equatorial Guinea. *Malaria Journal* 10: 184.
- 692 12. Russell TL, Govella NJ, Azizi S, Drakeley CJ, Kachur SP, et al. (2011) Increased  
693 proportions of outdoor feeding among residual malaria vector populations following  
694 increased use of insecticide-treated nets in rural Tanzania. *Malaria journal* 10: 80.
- 695 13. McCann RS, Ochomo E, Bayoh MN, Vulule JM, Hamel MJ, et al. (2014) Reemergence  
696 of *Anopheles funestus* as a vector of *Plasmodium falciparum* in western Kenya after  
697 long-term implementation of insecticide-treated bed nets. *The American journal of*  
698 *tropical medicine and hygiene* 90: 597-604.
- 699 14. Coetzee M, Koekemoer LL (2013) Molecular systematics and insecticide resistance in the  
700 major African malaria vector *Anopheles funestus*. *Annual review of entomology* 58:  
701 393-412.
- 702 15. Coetzee M, Fontenille D (2004) Advances in the study of *Anopheles funestus*, a major  
703 vector of malaria in Africa. *Insect biochemistry and molecular biology* 34: 599-605.
- 704 16. Gillies MT, De Meillon B (1968) The Anophelinae of Africa south of the Sahara  
705 (Ethiopian zoogeographical region). *The Anophelinae of Africa south of the Sahara*  
706 (Ethiopian Zoogeographical Region).
- 707 17. Cohuet A, Simard F, Wondji CS, Antonio-Nkondjio C, Awono-Ambene P, et al. (2004)  
708 High malaria transmission intensity due to *Anopheles funestus* (Diptera: Culicidae) in  
709 a village of savannah–forest transition area in Cameroon. *Journal of medical*  
710 *entomology* 41: 901-905.
- 711 18. Muturi EJ, Kamau L, Jacob BG, Muriu S, Mbogo CM, et al. (2009) Spatial distribution,  
712 blood feeding pattern, and role of *Anopheles funestus* complex in malaria  
713 transmission in central Kenya. *Parasitology research* 105: 1041-1046.
- 714 19. Riveron JM, Huijben S, Tchappa W, Tchouakui M, Wondji MJ, et al. (2019) Escalation  
715 of pyrethroid resistance in the malaria vector *Anopheles funestus* induces a loss of  
716 efficacy of piperonyl butoxide–based insecticide-treated nets in Mozambique. *The*  
717 *Journal of infectious diseases* 220: 467-475.
- 718 20. Djouaka R, Riveron JM, Yessoufou A, Tchigossou G, Akoton R, et al. (2016) Multiple  
719 insecticide resistance in an infected population of the malaria vector *Anopheles*  
720 *funestus* in Benin. *Parasites & vectors* 9: 1-12.
- 721 21. Riveron JM, Osaë M, Egyir-Yawson A, Irving H, Ibrahim SS, et al. (2016) Multiple  
722 insecticide resistance in the major malaria vector *Anopheles funestus* in southern  
723 Ghana: implications for malaria control. *Parasites & vectors* 9: 1-9.
- 724 22. Menze BD, Riveron JM, Ibrahim SS, Irving H, Antonio-Nkondjio C, et al. (2016)  
725 Multiple insecticide resistance in the malaria vector *Anopheles funestus* from  
726 Northern Cameroon is mediated by metabolic resistance alongside potential target site  
727 insensitivity mutations. *PloS one* 11: e0163261.
- 728 23. Morgan JC, Irving H, Okedi LM, Steven A, Wondji CS (2010) Pyrethroid resistance in an  
729 *Anopheles funestus* population from Uganda. *PloS one* 5: e11872.
- 730 24. Cuamba N, Morgan JC, Irving H, Steven A, Wondji CS (2010) High level of pyrethroid  
731 resistance in an *Anopheles funestus* population of the Chokwe District in  
732 Mozambique. *PloS one* 5: e11010.



- 733 25. Kaindoa EW, Matowo NS, Ngowo HS, Mkandawile G, Mmbando A, et al. (2017)  
734 Interventions that effectively target *Anopheles funestus* mosquitoes could  
735 significantly improve control of persistent malaria transmission in south–eastern  
736 Tanzania. *PLoS ONE* 12: e0177807.
- 737 26. Limwagu AJ, Kaindoa EW, Ngowo HS, Hape E, Finda M, et al. (2019) Using a  
738 miniaturized double-net trap (DN-Mini) to assess relationships between indoor–  
739 outdoor biting preferences and physiological ages of two malaria vectors, *Anopheles*  
740 *arabiensis* and *Anopheles funestus*. *Malaria journal* 18: 1-15.
- 741 27. Lwetoijera DW, Harris C, Kiware SS, Dongus S, Devine GJ, et al. (2014) Increasing role  
742 of *Anopheles funestus* and *Anopheles arabiensis* in malaria transmission in the  
743 Kilombero Valley, Tanzania. *Malaria journal* 13: 331.
- 744 28. Kakilla C, Manjurano A, Nelwin K, Martin J, Mashauri F, et al. (2020) Malaria vector  
745 species composition and entomological indices following indoor residual spraying in  
746 regions bordering Lake Victoria, Tanzania. *Malaria journal* 19: 1-14.
- 747 29. Nambunga IH, Ngowo HS, Mapua SA, Hape EE, Msugupakulya BJ, et al. (2020) Aquatic  
748 habitats of the malaria vector *Anopheles funestus* in rural south-eastern Tanzania.  
749 *Malaria Journal* 19: 1-11.
- 750 30. Thawer SG, Chacky F, Runge M, Reaves E, Mandike R, et al. (2020) Sub-national  
751 stratification of malaria risk in mainland Tanzania: a simplified assembly of survey  
752 and routine data. *Malaria journal* 19: 1-12.
- 753 31. Moshia JF, Kulkarni MA, Messenger LA, Rowland M, Matowo N, et al. (2021) Protocol  
754 for a four parallel-arm, single-blind, cluster-randomised trial to assess the  
755 effectiveness of three types of dual active ingredient treated nets compared to  
756 pyrethroid-only long-lasting insecticidal nets to prevent malaria transmitted by  
757 pyrethroid insecticide-resistant vector mosquitoes in Tanzania. *BMJ Open* 11:  
758 e046664.
- 759 32. Eze IC, Kramer K, Msengwa A, Mandike R, Lengeler C (2014) Mass distribution of free  
760 insecticide-treated nets do not interfere with continuous net distribution in Tanzania.  
761 *Malaria journal* 13: 1-10.
- 762 33. Minakawa N, Dida GO, Sonye GO, Futami K, Njenga SM (2012) Malaria vectors in Lake  
763 Victoria and adjacent habitats in western Kenya. *PloS one* 7: e32725.
- 764 34. Sinka ME, Bangs MJ, Manguin S, Rubio-Palis Y, Chareonviriyaphap T, et al. (2012) A  
765 global map of dominant malaria vectors. *Parasites & vectors* 5: 1-11.
- 766 35. Kelly-Hope LA, Hemingway J, McKenzie FE (2009) Environmental factors associated  
767 with the malaria vectors *Anopheles gambiae* and *Anopheles funestus* in Kenya.  
768 *Malaria journal* 8: 268.
- 769 36. Wiebe A, Longbottom J, Gleave K, Shearer FM, Sinka ME, et al. (2017) Geographical  
770 distributions of African malaria vector sibling species and evidence for insecticide  
771 resistance. *Malaria journal* 16: 85.
- 772 37. Adja A, N'goran E, Koudou B, Dia I, Kengne P, et al. (2011) Contribution of *Anopheles*  
773 *funestus*, *An. gambiae* and *An. nili* (Diptera: Culicidae) to the perennial malaria  
774 transmission in the southern and western forest areas of Côte d'Ivoire. *Annals of*  
775 *Tropical Medicine & Parasitology* 105: 13-24.
- 776 38. Koudou B, Doumbia M, Janmohamed N, Tschannen A, Tanner M, et al. (2010) Effects of  
777 seasonality and irrigation on malaria transmission in two villages in Côte d'Ivoire.  
778 *Annals of Tropical Medicine & Parasitology* 104: 109-121.
- 779 39. Mutero CM, Kabutha C, Kimani V, Kabuage L, Gitau G, et al. (2004) A transdisciplinary  
780 perspective on the links between malaria and agroecosystems in Kenya. *Acta tropica*  
781 89: 171-186.



- 782 40. Wondwosen B, Birgersson G, Seyoum E, Tekie H, Torto B, et al. (2016) Rice volatiles  
783 lure gravid malaria mosquitoes, *Anopheles arabiensis*. *Scientific Reports* 6: 37930.
- 784 41. Charlwood J, Vij R, Billingsley P (2000) Dry season refugia of malaria-transmitting  
785 mosquitoes in a dry savannah zone of east Africa. *The American journal of tropical*  
786 *medicine and hygiene* 62: 726-732.
- 787 42. Matowo NS, Abbasi S, Munhenga G, Tanner M, Mapua SA, et al. (2019) Fine-scale  
788 spatial and temporal variations in insecticide resistance in *Culex pipiens* complex  
789 mosquitoes in rural south-eastern Tanzania. *Parasites & vectors* 12: 1-13.
- 790 43. Fuseini G, Nguema RN, Phiri WP, Donfack OT, Cortes C, et al. (2019) Increased biting  
791 rate of insecticide-resistant culex mosquitoes and community adherence to IRS for  
792 malaria control in urban Malabo, Bioko Island, Equatorial Guinea. *Journal of medical*  
793 *entomology* 56: 1071-1077.
- 794 44. Toé LP, Skovmand O, Dabiré KR, Diabaté A, Diallo Y, et al. (2009) Decreased  
795 motivation in the use of insecticide-treated nets in a malaria endemic area in Burkina  
796 Faso. *Malaria journal* 8: 1-9.
- 797 45. Drakeley C, Schellenberg D, Kihonda J, Sousa C, Arez A, et al. (2003) An estimation of  
798 the entomological inoculation rate for Ifakara: a semi-urban area in a region of  
799 intense malaria transmission in Tanzania. *Tropical Medicine & International Health* 8:  
800 767-774.
- 801 46. Mbogo CN, Snow RW, Khamala CP, Kabiru EW, Ouma JH, et al. (1995) Relationships  
802 between *Plasmodium falciparum* transmission by vector populations and the  
803 incidence of severe disease at nine sites on the Kenyan coast. *The American journal*  
804 *of tropical medicine and hygiene* 52: 201-206.
- 805 47. Abraham M, Massebo F, Lindtjørn B (2017) High entomological inoculation rate of  
806 malaria vectors in area of high coverage of interventions in southwest Ethiopia:  
807 implication for residual malaria transmission. *Parasite epidemiology and control* 2:  
808 61-69.
- 809 48. Takken W, Verhulst NO (2013) Host preferences of blood-feeding mosquitoes. *Annual*  
810 *review of entomology* 58: 433-453.
- 811 49. Mahande A, Mosha F, Mahande J, Kweka E (2007) Feeding and resting behaviour of  
812 malaria vector, *Anopheles arabiensis* with reference to zoophylaxis. *Malaria*  
813 *journal* 6: 100.
- 814 50. White G, Magayuka SA, Boreham P (1972) Comparative studies on sibling species of the  
815 *Anopheles gambiae* Giles complex (Dipt., Culicidae): bionomics and vectorial  
816 activity of species A and species B at Segera, Tanzania. *Bulletin of Entomological*  
817 *Research* 62: 295-317.
- 818 51. Kitau J, Oxborough RM, Tungu PK, Matowo J, Malima RC, et al. (2012) Species shifts  
819 in the *Anopheles gambiae* complex: do LLINs successfully control *Anopheles*  
820 *arabiensis*? *PloS one* 7: e31481.
- 821 52. Guelbeogo WM, Sagnon NF, Liu F, Besansky NJ, Costantini C (2014) Behavioural  
822 divergence of sympatric *Anopheles funestus* populations in Burkina Faso. *Malaria*  
823 *journal* 13: 65.
- 824 53. Coluzzi M, Sabatini A, Petrarca V, Di Deco MA (1977) Behavioural divergences  
825 between mosquitoes with different inversion karyotypes in polymorphic populations  
826 of the *Anopheles gambiae* complex. *Nature* 266: 832-833.
- 827 54. Finda MF, Moshi IR, Monroe A, Limwagu AJ, Nyoni AP, et al. (2019) Linking human  
828 behaviours and malaria vector biting risk in south-eastern Tanzania. *PloS one* 14:  
829 e0217414.
- 830 55. Killeen GF, Tatarsky A, Diabate A, Chaccour CJ, Marshall JM, et al. (2017) Developing  
831 an expanded vector control toolbox for malaria elimination. *BMJ Global Health* 2.

- 832 56. Reid MC, McKenzie FE (2016) The contribution of agricultural insecticide use to  
833 increasing insecticide resistance in African malaria vectors. *Malaria journal* 15: 107.
- 834 57. Philbert A, Lyantagaye SL, Nkwengulila G (2019) Farmers' pesticide usage practices in  
835 the malaria endemic region of North-Western Tanzania: implications to the control of  
836 malaria vectors. *BMC public health* 19: 1456.
- 837 58. Matowo NS, Tanner M, Munhenga G, Mapua SA, Finda M, et al. (2020) Patterns of  
838 pesticide usage in agriculture in rural Tanzania call for integrating agricultural and  
839 public health practices in managing insecticide-resistance in malaria vectors. *Malaria*  
840 *Journal* 19: 257.
- 841 59. Protopopoff N, Matowo J, Malima R, Kavishe R, Kaaya R, et al. (2013) High level of  
842 resistance in the mosquito *Anopheles gambiae* to pyrethroid insecticides and reduced  
843 susceptibility to bendiocarb in north-western Tanzania. *Malaria Journal* 12: 149.
- 844 60. Moyes CL, Wiebe A, Gleave K, Trett A, Hancock PA, et al. (2019) Analysis-ready  
845 datasets for insecticide resistance phenotype and genotype frequency in African  
846 malaria vectors. *Scientific data* 6: 1-11.
- 847 61. Hancock PA, Hendriks CJ, Tangena J-A, Gibson H, Hemingway J, et al. (2020) Mapping  
848 trends in insecticide resistance phenotypes in African malaria vectors. *PLoS biology*  
849 18: e3000633.
- 850 62. Oumbouke WA, Pignatelli P, Barreaux AM, Tia IZ, Koffi AA, et al. (2020) Fine scale  
851 spatial investigation of multiple insecticide resistance and underlying target-site and  
852 metabolic mechanisms in *Anopheles gambiae* in central Côte d'Ivoire. *Scientific*  
853 *reports* 10: 1-13.
- 854 63. Vontas J, Grigoraki L, Morgan J, Tsakireli D, Fuseini G, et al. (2018) Rapid selection of a  
855 pyrethroid metabolic enzyme CYP9K1 by operational malaria control activities.  
856 *Proceedings of the National Academy of Sciences* 115: 4619-4624.
- 857 64. Ngufor C, N'Guessan R, Fagbohoun J, Subramaniam K, Odjo A, et al. (2015) Insecticide  
858 resistance profile of *Anopheles gambiae* from a phase II field station in Cové,  
859 southern Benin: implications for the evaluation of novel vector control products.  
860 *Malaria journal* 14: 1-10.
- 861 65. Tanzania N (2013) 2012 population and housing census.
- 862 66. Mosha JF, Sturrock HJW, Brown JM, Hashim R, Kibiki G, et al. (2014) The independent  
863 effect of living in malaria hotspots on future malaria infection: an observational study  
864 from Misungwi, Tanzania. *Malaria Journal* 13: 445.
- 865 67. Renggli S, Mandike R, Kramer K, Patrick F, Brown NJ, et al. (2013) Design,  
866 implementation and evaluation of a national campaign to deliver 18 million free long-  
867 lasting insecticidal nets to uncovered sleeping spaces in Tanzania. *Malar J* 12: 85.
- 868 68. Fick SE, Hijmans RJ (2017) WorldClim 2: new 1 km spatial resolution climate surfaces  
869 for global land areas. *International journal of climatology* 37: 4302-4315.
- 870 69. Reuter HI, Nelson A, Jarvis A (2007) An evaluation of void-filling interpolation methods  
871 for SRTM data. *International Journal of Geographical Information Science* 21: 983-  
872 1008.
- 873 70. Charlwood JD, Rowland M, Protopopoff N, Le Clair C (2017) The Furvela tent-trap Mk  
874 1.1 for the collection of outdoor biting mosquitoes. *PeerJ* 5: e3848.
- 875 71. Vazquez-Prokopec GM, Galvin WA, Kelly R, Kitron U (2009) A new, cost-effective,  
876 battery-powered aspirator for adult mosquito collections. *Journal of medical*  
877 *entomology* 46: 1256-1259.
- 878 72. Servic M (1993) Entomological field techniques for malaria control: Part I. Learner's  
879 Guide & Part II. Tutor's Guide. Geneva: World Health Organization, 1992. Part I,  
880 77pp, Part II, 54pp. Price Part I, Sw. fr 15; Part II, SW. fr. 12;(developing countries

- 881 Sw. fr. 10.50 & 8.40 respectively). ISBN Part I, 92-4-154439-2; Part II, 92-4-15440-  
882 6. Royal Society of Tropical Medicine and Hygiene.
- 883 73. Silver JB (2007) Mosquito ecology: field sampling methods: springer science & business  
884 media.
- 885 74. WHO (2016) Test procedures for insecticide resistance monitoring in malaria vector  
886 mosquitoes. Geneva, World Health Organisation.
- 887 75. Brogdon W, Chan A (2010) Guideline for evaluating insecticide resistance in vectors  
888 using the CDC bottle bioassay. USA: CDC Atlanta.
- 889 76. Gillies M De meillon D (1968) The Anophelinae of Africa South of the Sahara. Publ  
890 South Afri Inst Med Res 54: 343.
- 891 77. Burkot T, Williams J, Schneider I (1984) Identification of Plasmodium falciparum-  
892 infected mosquitoes by a double antibody enzyme-linked immunosorbent assay. The  
893 American journal of tropical medicine and hygiene 33: 783-788.
- 894 78. Bass C, Williamson MS, Field LM (2008) Development of a multiplex real-time PCR  
895 assay for identification of members of the Anopheles gambiae species complex. Acta  
896 tropica 107: 50-53.
- 897 79. Vezenegho SB, Bass C, Puinean M, Williamson MS, Field LM, et al. (2009)  
898 Development of multiplex real-time PCR assays for identification of members of the  
899 Anopheles funestus species group. Malaria Journal 8: 1-9.
- 900 80. Bass C, Nikou D, Donnelly MJ, Williamson MS, Ranson H, et al. (2007) Detection of  
901 knockdown resistance (kdr) mutations in Anopheles gambiae: a comparison of two  
902 new high-throughput assays with existing methods. Malaria Journal 6: 1-14.
- 903 81. Müller P, Warr E, Stevenson BJ, Pignatelli PM, Morgan JC, et al. (2008) Field-caught  
904 permethrin-resistant Anopheles gambiae overexpress CYP6P3, a P450 that  
905 metabolises pyrethroids. PLoS Genet 4: e1000286.
- 906 82. Mavridis K, Wipf N, Medves S, Erquiaga I, Müller P, et al. (2019) Rapid multiplex gene  
907 expression assays for monitoring metabolic resistance in the major malaria vector  
908 Anopheles gambiae. Parasites & vectors 12: 9.
- 909 83. StataCorp L (2017) StataCorp. Stata Statistical Software: Release 15.1. College Station,  
910 TX: StataCorp LP.
- 911 84. Rao X, Huang X, Zhou Z, Lin X (2013) An improvement of the  $2^{(-\Delta\Delta CT)}$   
912 method for quantitative real-time polymerase chain reaction data analysis. Biostat  
913 Bioinforma Biomath 3: 71-85.

## 914 **Acknowledgments**

915 We thank the entomology technicians for their support in the field work and Misungwi  
916 District residents for their acceptance and cooperation throughout the study. This study was  
917 funded by the Department for International Development, the UK Medical Research Council,  
918 the Wellcome Trust and the Department of Health and Social Care (#MR/R006040/1).

919

## 920 **Author contributions**

921 NP, FWM, MR, MAK, JFM and AM wrote the main study protocol and design the study.  
922 NSM, NP, LAM, PH, CM performed data analysis. GI, BS and RB performed the molecular  
923 analysis. JM and NSM supervised the study data collections. NSM wrote the initial draft of  
924 the manuscript, which was revised by NP and LAM. All authors read and approved the final  
925 manuscript.

926

927 **Competing interests**

928 The authors declare no competing interests.

929 **Table 1. Household characteristics in the study area in Northern and Southern clusters.** The district spans two agro-ecological zones, based  
 930 on vegetation land cover and rainfall (Figure 1), that are divided roughly into northern and southern clusters.

| Outcome                                                 | All  |                         | Northern villages |                        | Southern villages |                        |
|---------------------------------------------------------|------|-------------------------|-------------------|------------------------|-------------------|------------------------|
|                                                         | N    | % /mean [95% CI]        | N                 | %/ mean [95% CI]       | N                 | %/mean [95% CI]        |
| Total HHs visited                                       | 1593 | N/A                     | 980               | N/A                    | 613               | N/A                    |
| Total consents given                                    | 1373 | N/A                     | 847               | N/A                    | 526               | N/A                    |
| Total HHs analysed                                      | 1372 | N/A                     | 846               | N/A                    | 526               | N/A                    |
| Average number of people per household                  | 1372 | 6.6 [6.4 - 6.8]         | 846               | 6.5 [6.2-6.8]          | 526               | 6.8 [6.4-7.1]          |
| Average number of sleeping space                        | 1372 | 2.7 [2.6 - 2.8]         | 846               | 2.7 [2.6 -2.8]         | 526               | 2.7 [2.5 -2.8]         |
| Average altitude (meters)                               | 1372 | 1194.9 [1187.5 -1202.4] | 846               | 1195.3 [1186.2-1204.3] | 525               | 1194.4 [1181.0-1207.8] |
| % household with iron roof                              | 1372 | 67.4% [63.2 -71.2]      | 846               | 67.2% [61.0 - 72.7]    | 526               | 67.7% [62.5 -72.5]     |
| % household with open eaves                             | 1372 | 40.6% [37.0 - 44.3]     | 846               | 38.4% [33.7 -43.4]     | 526               | 44.1% [38.6 -49.8]     |
| % household with screened windows                       | 1372 | 29.9% [26.2-33.7]       | 846               | 33.1% [28.1 -38.5]     | 526               | 24.5% [20.1-29.5]      |
| % houses made of brick walls                            | 1372 | 67.5% [62.5 - 72.1]     | 846               | 68.9% [62.6 - 74.6]    | 526               | 65.2% [56.6- 72.9]     |
| % houses with no ceiling                                | 1372 | 97.2% [95.4 - 98.3]     | 846               | 96.3% [93.5 - 98.0]    | 526               | 98.5% [96.9 - 99.3]    |
| % houses with modern constructed materials              | 1372 | 51.8% [47.8-55.8]       | 846               | 53.7% [48.1-59.1]      | 526               | 48.9% [43.1-54.6]      |
| % household owning cattle and goats                     | 1372 | 43.8% [39.8 - 47.9]     | 846               | 41.3% [36.0 -46.8]     | 526               | 47.7% [41.8 -53.7]     |
| % of household owning at least one ITN                  | 1372 | 94.9% [93.5 -96.0]      | 846               | 95.3% [93.5 -96.6]     | 526               | 94.3% [91.5 -96.2]     |
| Mean number of ITN per house                            | 1372 | 2.3 [2.2-2.4]           | 846               | 2.4 [2.2-2.5]          | 526               | 2.1 [2.0 -2.3]         |
| Population access to ITN (One net for every two people) | 1372 | 67.9% [65.8 - 70.1]     | 846               | 70.4% [67.8-73.1]      | 526               | 63.9% [60.5 - 67.3]    |
| % HHs with enough nets to cover their sleeping places   | 1372 | 62.3% [59.0-65.7]       | 846               | 64.1% [59.9-68.2]      | 526               | 59.5% [53.7-65.4]      |
| % of household sprayed in 2015                          | 1372 | 54.2% [49.8-58.5]       | 445               | 52.5% [46.5 -58.4]     | 299               | 56.8% [50.3- 63.2]     |

931 HH; household; ITN; insecticide treated net; N/A; not applicable

932

933

934 **Table 2. Malaria vector species composition, sporozoite rate and entomological inoculation rate (EIR) per study zone**

| Outcome                                    | Overall |                    | Northern villages |                     | Southern villages |                    |
|--------------------------------------------|---------|--------------------|-------------------|---------------------|-------------------|--------------------|
|                                            | N       | %/ mean [95% CI]   | N                 | % /mean [95% CI]    | N                 | % /mean [95% CI]   |
| Total HH/night collection                  | 1372    | N/A                | 846               | N/A                 | 526               | N/A                |
| Mean mosquitoes per night per house        | 23,081  | 16.8 [11.6-22.0]   | 9830              | 11.6 [7.5-15.8]     | 13251             | 25.2 [13.9-36.4]   |
| Mean <i>Anopheles</i> vectors              | 5016    | 3.7 [1.9 - 5.4]    | 788               | 0.9 [0.5-1.4]       | 4228              | 8.0 [3.9 -12.1]    |
| Total <i>An. gambiae</i> s.l               | 276     | 0.2 [0.1-0.3]      | 176               | 0.2 [0.1-0.3]       | 100               | 0.2 [0.1-0.3]      |
| Total <i>An. funestus</i> s.l              | 4740    | 3.5 [1.7-5.2]      | 612               | 0.7 [0.3-1.1]       | 4128              | 7.8 [3.8 - 11.9]   |
| Total <i>Culex</i> species                 | 15609   | 11.4 [7.7-15.0]    | 7417              | 8.8 [5.6-12.0]      | 8192              | 15.6 [7.8-23.3]    |
| Proportion of <i>An. arabiensis</i> , n/N  | 150/185 | 81.1% [67.9 -89.7] | 70/103            | 68.0% [49.6 - 82.1] | 80/82             | 97.6% [91.8- 99.3] |
| Proportion of <i>An. gambiae</i> s.s, n/N  | 35/185  | 18.9% [10.3-32.1]  | 33/103            | 32.0% [17.9 - 50.4] | 2/82              | 2.4% [0.7- 8.2]    |
| Proportion of <i>An. funestus</i> s.s, n/N | 710/764 | 92.9% [89.7- 95.2] | 202/220           | 91.8% [85.9 - 95.4] | 508/544           | 93.3% [89.1- 96.0] |
| Sporozoite rate, n/N                       | 67/1963 | 3.4% [2.5- 4.6]    | 13/603            | 2.2% [1.1 - 4.1]    | 54/1360           | 4.0% [2.9 - 5.4]   |
| Monthly EIR/house                          | 1349    | 4.4 [1.2- 7.7]     | 831               | 0.6 [0.1 - 1.2]     | 518               | 9.6 [2.7- 16.4]    |

935 EIR: entomological inoculation rate; HH: household; N/A: not applicable

936

937

938

939

940

941

942

943

944

945

946

947 **Table 3. Seasonal variation between *An. funestus* s.l. and *An. gambiae* s.l. sporozoite rate and entomological inoculation rate (EIR).**

| <b>Outcome</b>                              | <b><i>Anopheles funestus</i> s.l.</b> | <b><i>Anopheles gambiae</i> s.l.</b> |
|---------------------------------------------|---------------------------------------|--------------------------------------|
| Total collection nights                     | 1372                                  | 1372                                 |
| Total number of mosquitoes collected        | 4740                                  | 276                                  |
| Mean collection in wet season               | 2.87 [1.09 - 4.65]                    | 0.23 [0.11 - 0.36]                   |
| Mean collection in dry season               | 4.61 [1.93 - 7.30]                    | 0.14 [0.07 - 0.20]                   |
| No. sample analysed for the presence of CSP | 1714                                  | 249                                  |
| Number of sporozoite positive               | 59                                    | 8                                    |
| Overall SR % (95% CI)                       | 3.44% [2.52 - 4.68]                   | 3.21% [1.32 - 7.60]                  |
| SR wet season                               | 3.82% [2.56 - 5.66]                   | 3.59% [1.34 - 9.23]                  |
| SR dry season                               | 2.85% [1.71 - 4.72]                   | 1.85% [0.23 - 13.24]                 |
| Mean monthly EIR (weighted)                 | 4.57 [1.05 - 8.09]                    | 0.17 [0.01 - 0.33]                   |
| EIR wet season                              | 4.67[0.03 - 9.32]                     | 0.23 [0.01 - 0.45]                   |
| EIR dry season                              | 4.38 [0.69 - 8.07]                    | 0.07 [0.06 - 0.20]                   |
| Estimate annual EIR (weighted)              | 54.85 [12.60 - 97.09]                 | 2.01 [0.12 - 3.91]                   |
| % EIR contribution (weighted)               | 96.47%                                | 3.53%                                |

948 EIR: entomological inoculation rate; SR: sporozoite rate

949

950

951

952

953

954

955

956

957



958 **Table 4. Indoor and outdoor *Anopheles* feeding and resting behaviours and species composition.**

| Outcome                                | CDC LT indoors      | Furvela tent trap outdoors | Prokopack indoors   | Prokopack outdoors  |
|----------------------------------------|---------------------|----------------------------|---------------------|---------------------|
| Total HH/night collection              | 96                  | 96                         | 96                  | 96                  |
| Total <i>Anopheles</i> vectors         | 536                 | 464                        | 56                  | 52                  |
| Mean malaria vector                    | 5.6 [2.3 - 8.8]     | 4.8 [2.9 - 6.7]            | 0.6 [0.2 -0.9]      | 0.5 [0.1 -1.0]      |
| Proportion <i>An. gambiae</i> s.l.     | 33.6% [14.4 -52.7]  | 49.8% [32.2 - 67.4]        | 51.8% [26.8 -76.7]  | 71.2% [43.0 - 99.3] |
| Proportion <i>An. funestus</i> s.l.    | 66.4% [47.3 -85.6]  | 50.2% [32.6 -67.8]         | 48.2% [23.3 - 73.2] | 28.8% [0.7 -57.0]   |
| Proportion of <i>An. arabiensis</i>    | 54.7% [25.5 - 81.0] | 51.8% [26.7 - 76.0]        | 54.5% [12.5 - 91.0] | 89.5% [54.3 - 98.4] |
| Proportion of <i>An. gambiae</i> s.s.  | 45.3% [19.0 -74.5]  | 48.2% [24.0 -73.3]         | 45.5% [9.0- 87.5]   | 10.5% [1.6 - 45.7]  |
| Proportion of <i>An. funestus</i> s.s. | 96.4% [91.7-98.5]   | 99.4% [95.4-99.9]          | 100%                | 100%                |
| Total <i>Anopheles</i> tested for CSP  | 412                 | 408                        | 51                  | 52                  |
| Number of sporozoite positive          | 7                   | 7                          | 2                   | 0                   |
| % SR                                   | 1.7% [0.8 -3.5]     | 1.7% [0.8 - 3.6]           | 3.9% [1.0 - 14.4]   | 0.0%                |

959 CDC: Centers for Disease Control and Prevention; CSP: circumsporozoite protein; HH: household; LT: light trap; SR: sporozoite rate

960

961

962

963

964

965

966

967

968

969

970

971 **Table 5. Average 30-minute knock-down and 24-hour mortality to the diagnostic dose of alpha-cypermethrin (CDC bottle bioassays:**  
 972 **12.5 µg/ml), among wild *Anopheles* species, collected from three study clusters in Misungwi, 2018.**  
 973

| Study ward | Location | <i>Anopheles</i> species tested | 30 mins Knock-down [95%CI] | 24 hrs Mortality [95%CI] |
|------------|----------|---------------------------------|----------------------------|--------------------------|
| Ilujamate  | Southern | <i>An. funestus</i> s.l.        | 43.68% [31.73 - 55.63]     | 62.11% [45.31 - 78.90]   |
| Kanyerere  | Northern | <i>An. funestus</i> s.l.        | 42.86%                     | 64.29%                   |
| Koromije   | Northern | <i>An. gambiae</i> s.l.         | 59.42% [41.89 - 76.95]     | 66.67% [38.52 -94.81]    |

974

975

976 **Table 6. Average 60-minute knock-down and 24-hour mortality to the diagnostic dose of permethrin (WHO tube bioassays: 0.75%),**  
 977 **among wild *Anopheles* species, collected from five study wards in Misungwi, 2018.**  
 978

| Study ward | Location | <i>Anopheles</i> species tested | 60 mins Knock-down [95%CI] | 24 hrs Mortality [95%CI] |
|------------|----------|---------------------------------|----------------------------|--------------------------|
| Bulemeji   | Northern | <i>An. gambiae</i> s.l.         | 16.67% [9.09 - 28.57]      | 38.33% [24.30 -52.37]    |
| Idetemya   | Northern | <i>An. gambiae</i> s.l.         | 65.22% [47.32 -83.11]      | 56.52% [35.21 - 75.67]   |
| Ilujamate  | Southern | <i>An. funestus</i> s.l.        | 38.00% [26.65 -49.35]      | 40% [28.39 -51.61]       |
| Kanyerere  | Northern | <i>An. gambiae</i> s.l.         | 27.12% [13.92 - 40.32]     | 38.98% [12.00 -65.97]    |
| Mamaye     | Northern | <i>An. gambiae</i> s.l.         | 33.33% [19.30 - 47.37]     | 45.00% [35.81 -54.19]    |

979 **Figure 1: Study area in Misungwi district, north western Tanzania, displaying A: location of Misungwi in the Lake Region;**  
980 **landcover features of study clusters; and C: annual precipitation (mm) in study clusters.**

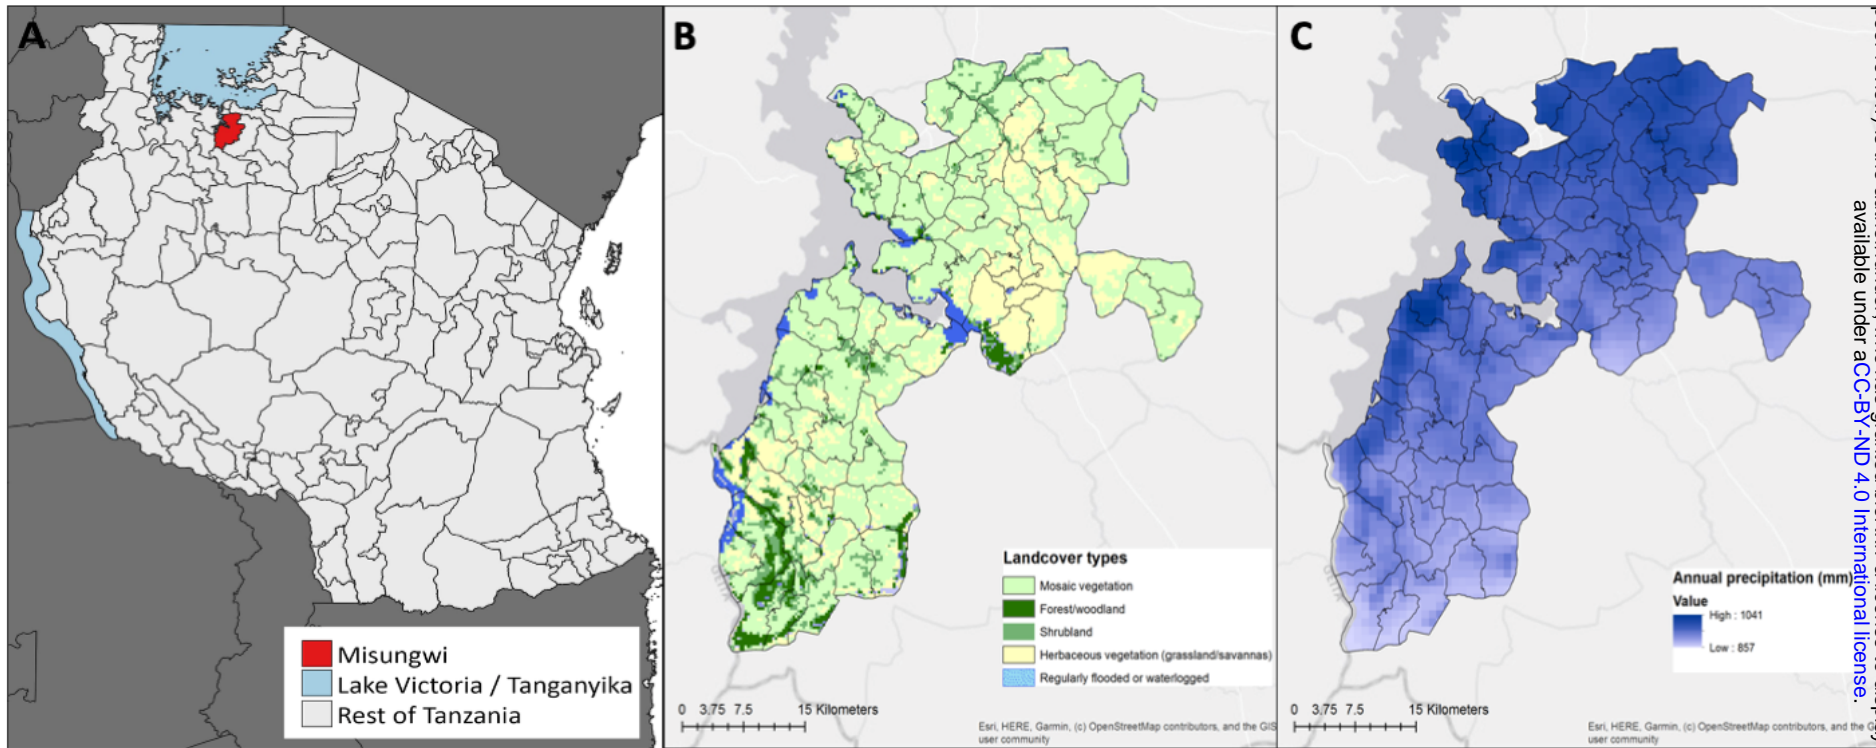

981  
982  
983  
984  
985

986 **Figure 2: Study area in Misungwi district, north western Tanzania, displaying A: distribution of *Anopheles funestus* s.l. and collection**  
987 **methods per cluster (hashed line indicates delineation between northern and southern clusters); B: distribution of *Anopheles gambiae***  
988 **s.l.; and C: predicted pyrethroid resistance for *An. gambiae* s.l. (mean percentage mortality).**

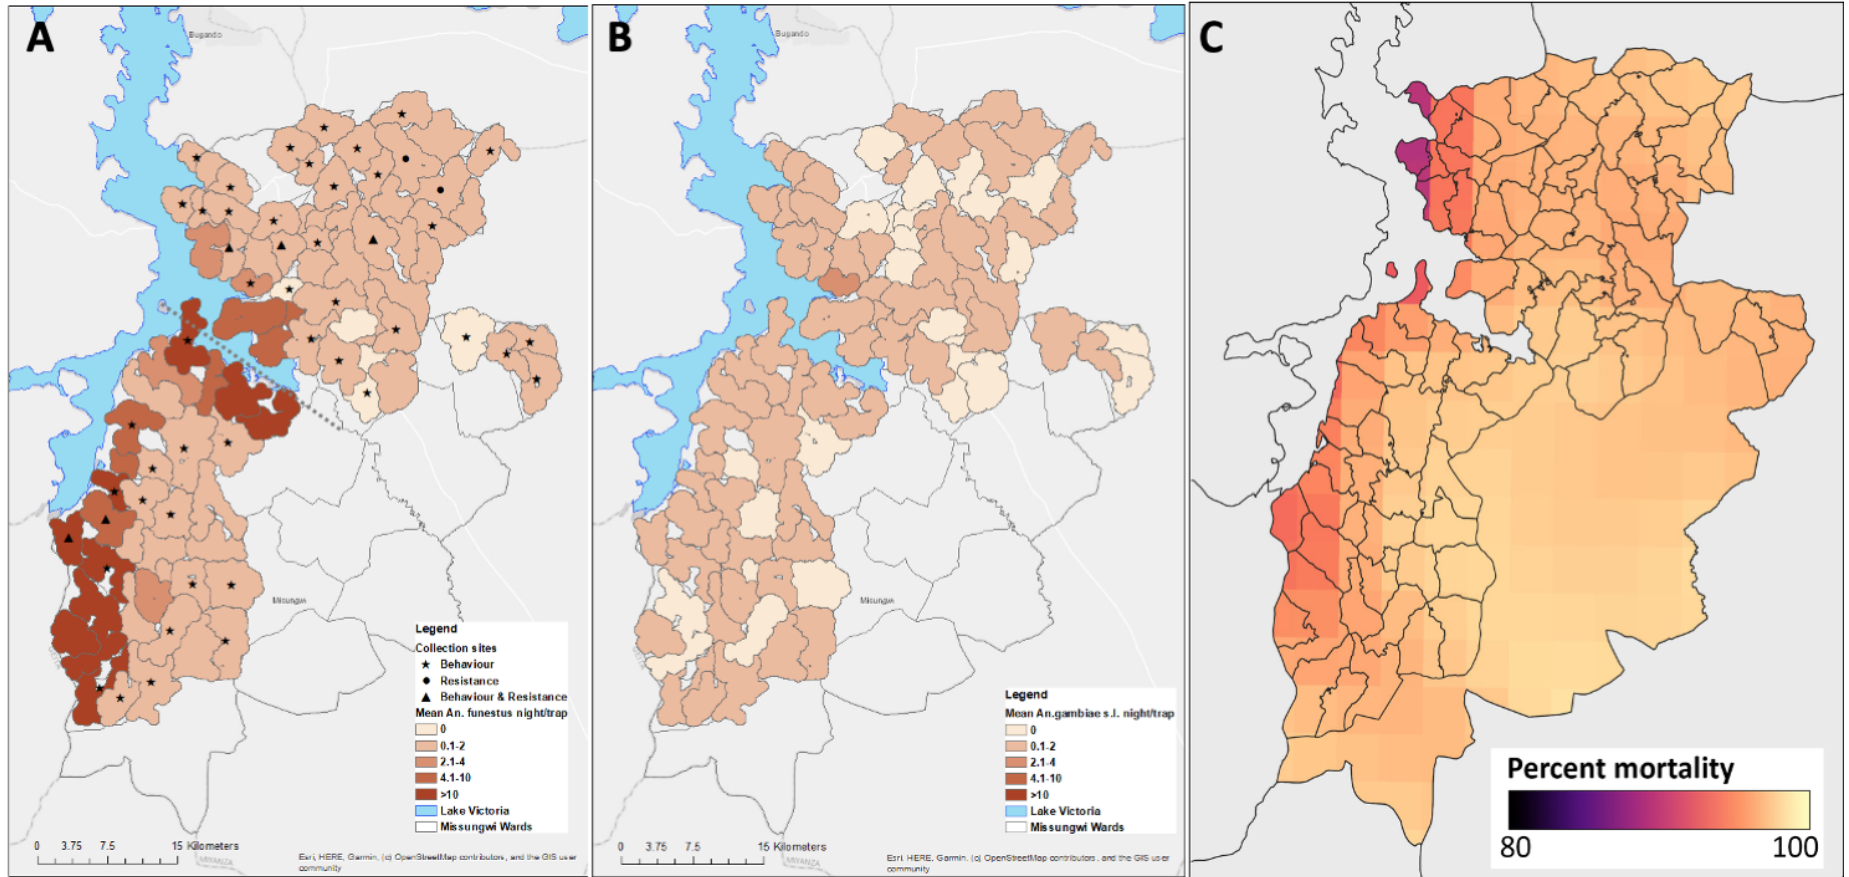

989  
990

991

992 **Figure 3. A: examples of different traditional house constructions, using local materials. B: the inside of a typical house with open eaves.**  
993 **C: a CDC-LT hung at the base of a sleeping space for sampling mosquitoes indoors. D: a Furvela tent trap set up for catching host-**  
994 **seeking female *Anopheles* mosquitoes outdoors.**

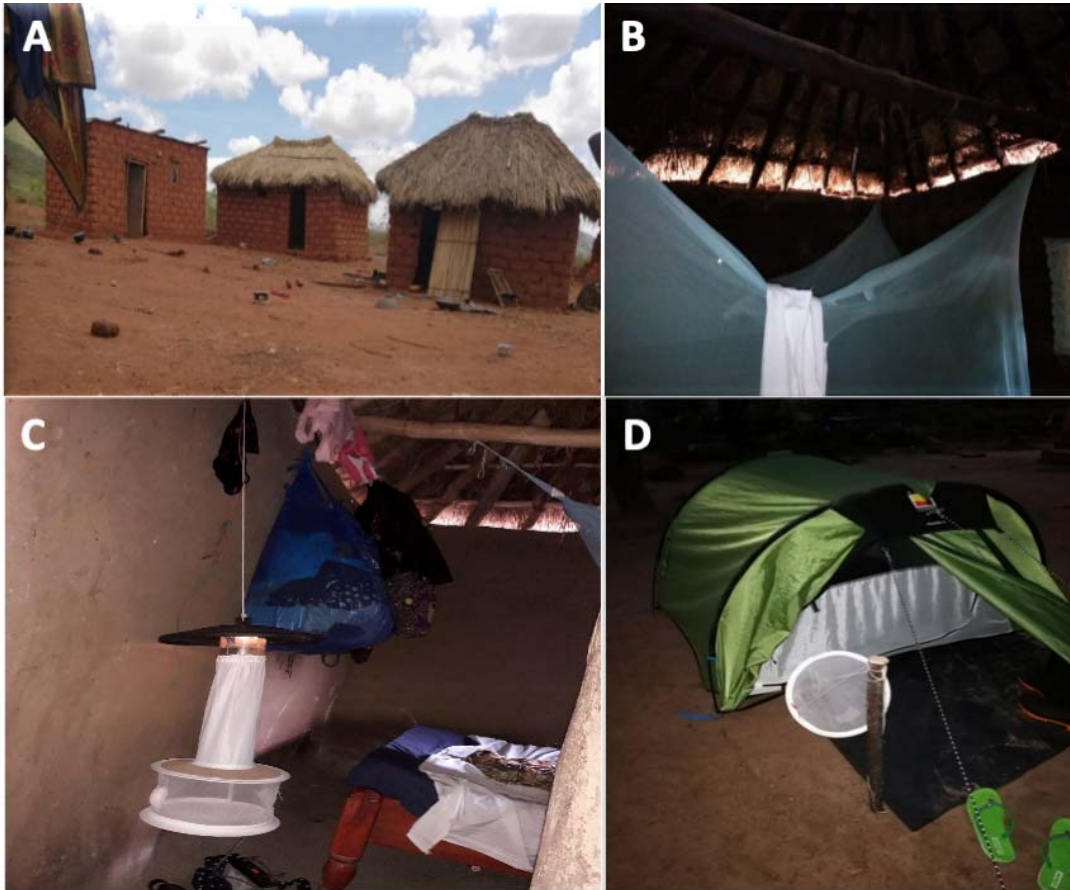

995
